# Supplementary material
Source: PubMed Central journal article supplement (PMC8183670)

Supplementary Figure 1. Gleason 5 pattern TMA set: Representative (A) H&E staining and (B) lymphocyte immunostaining in prostate tumor on tissue microarray cores. Immunostaining for CD3, CD8, and FOXP3 identifies respective specific subsets of tumor-infiltrating lymphocytes in prostate tumor (top). Aperio image software identifies CD3+ T cells, CD8+ T cells and FOXP3+ T cells (red) in selected tumor regions and surrounding tumor and stromal nuclei (blue; bottom).

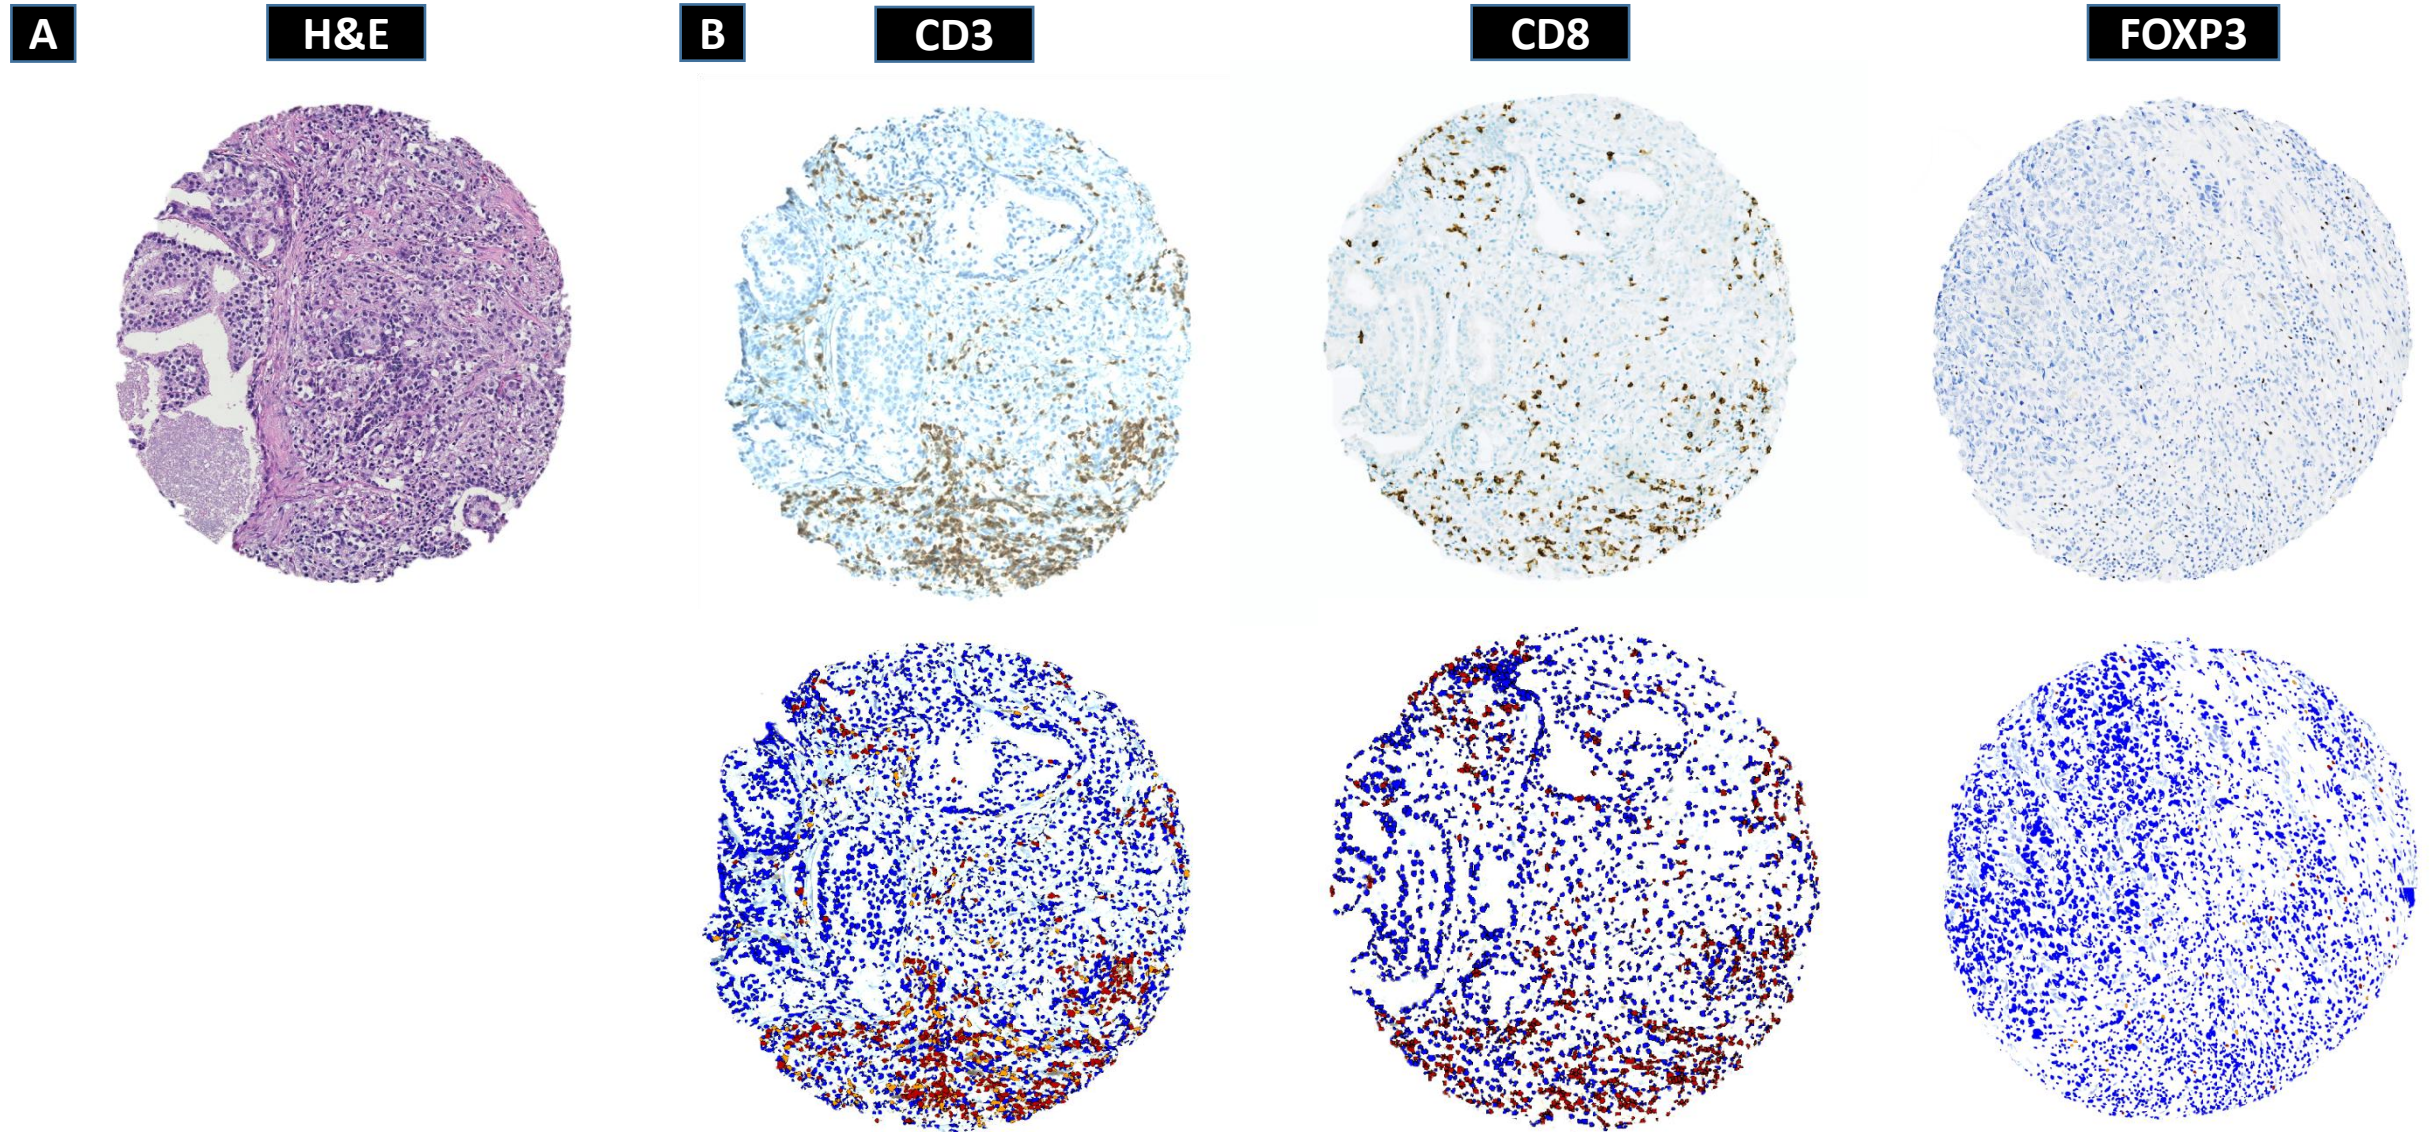

Supplementary Figure 2. Int-high risk TMA set: Representative (A) H&E staining and (B) lymphocyte immunostaining in prostate tumor on tissue microarray cores. Immunostaining for CD3, CD8, and FOXP3 identifies respective specific subsets of tumor-infiltrating lymphocytes in prostate tumor (top). Aperio image software identifies CD3+ T cells, CD8+ T cells and FOXP3+ T cells (red) in selected tumor regions and surrounding tumor and stromal nuclei (blue; bottom).

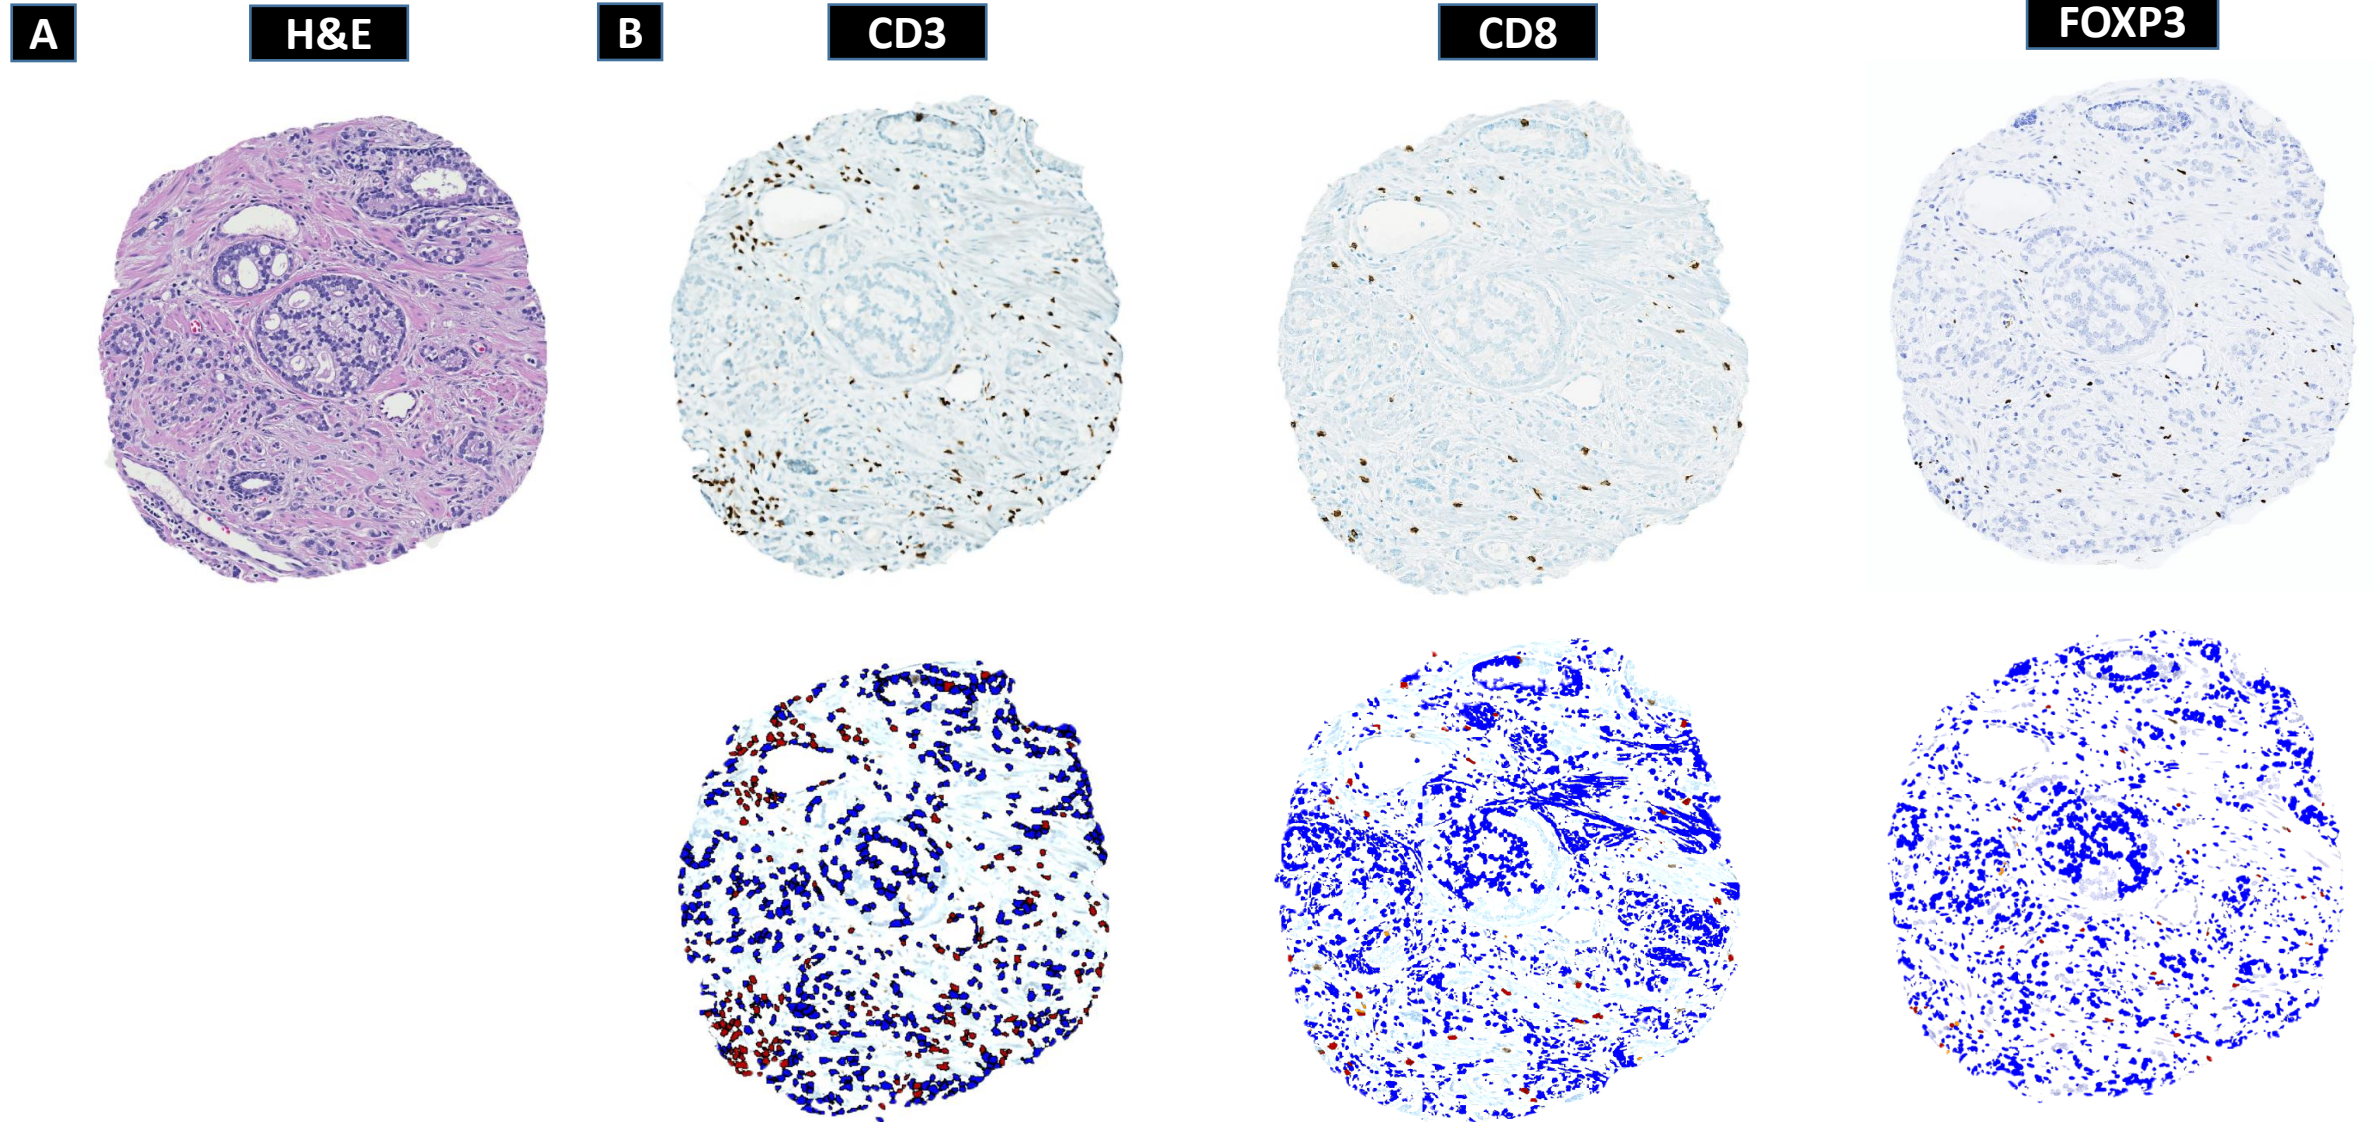

Supplementary Figure 3. Representative p53 immunostaining and matching H&Es on tissue microarray cores. p53 nuclear accumulation (p53+) signifies *TP53* missense mutation. All photomicrographs are reduced from 200x.

**H&E**

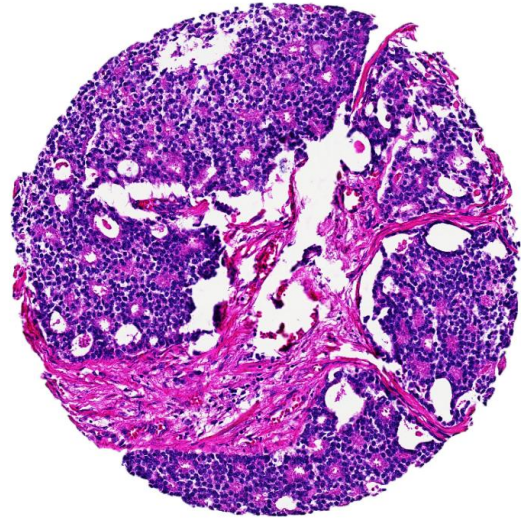

**P53-**

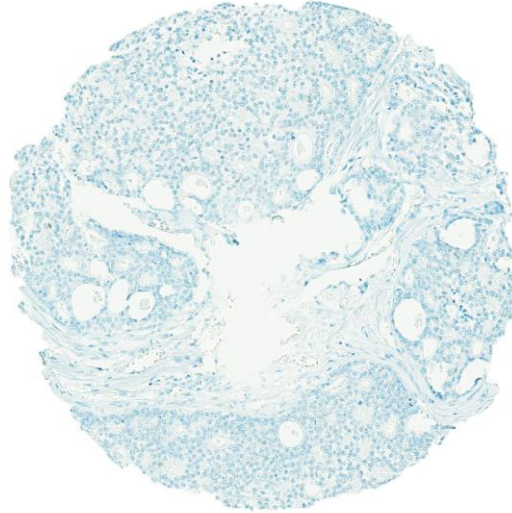

**H&E**

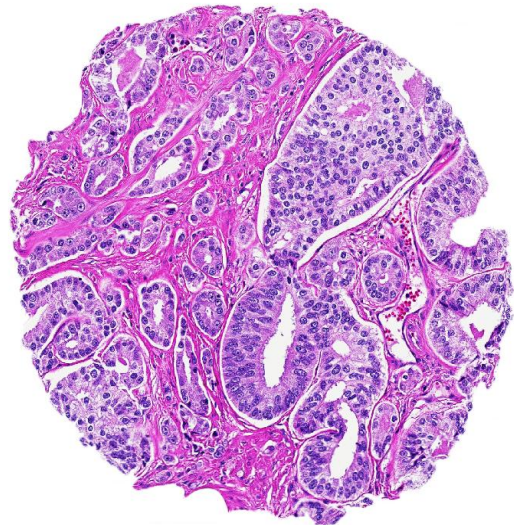

**P53+**

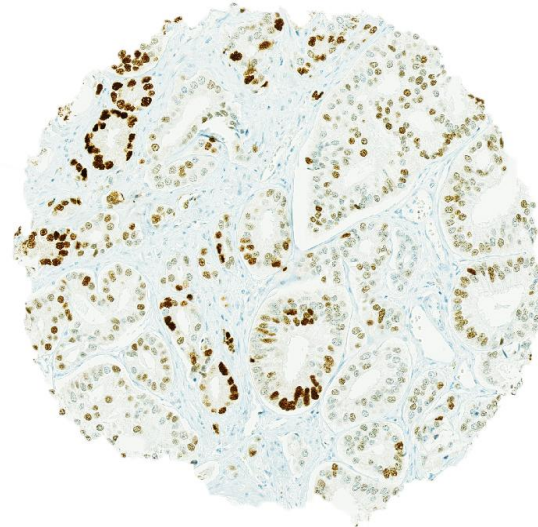

Supplement: NIHMS1702518-supplement-Supp_Figs.pdf [file NIHMS1702518-supplement-Supp_Figs.pdf]
